# Supplementary material
Source: ML conference proceedings conference paper supplement (https://openaccess.thecvf.com/content/WACV2024/html/Agnolucci_Reference-Based_Restoration_of_WACV_2024_paper.html)

Pristine images

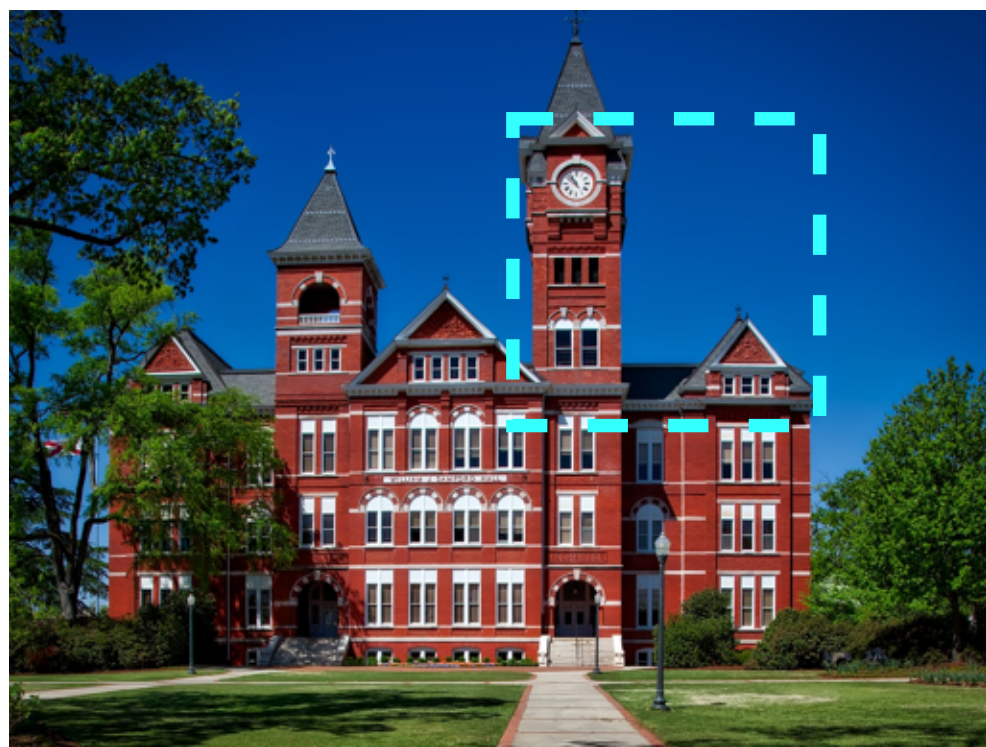

Downsample

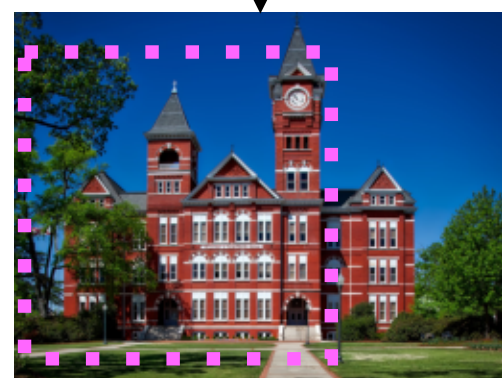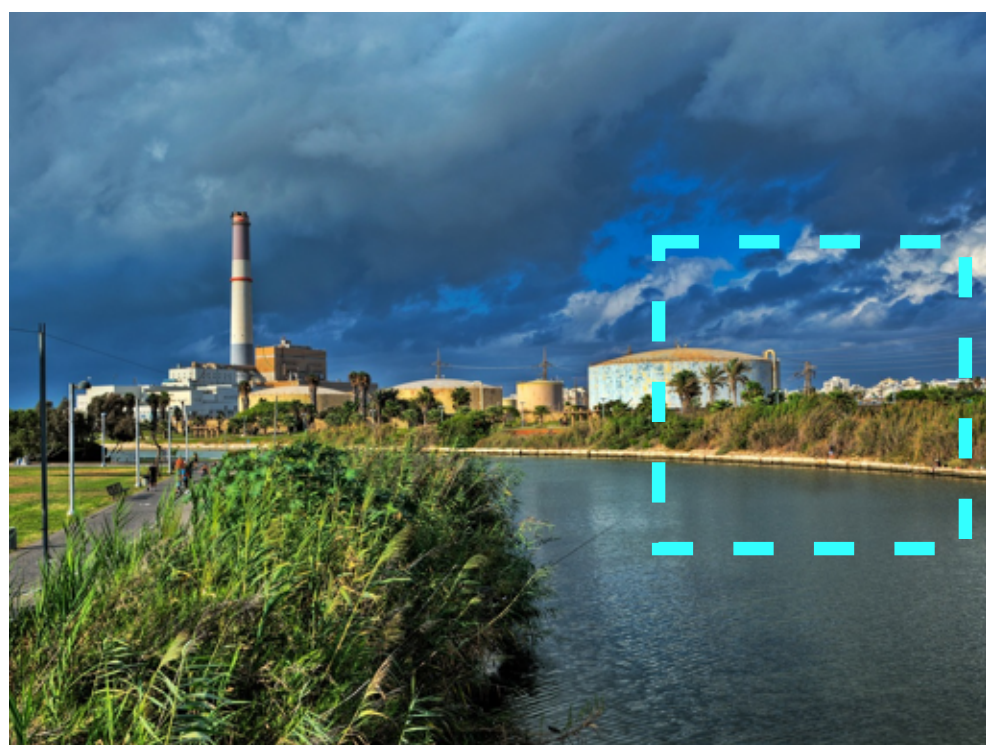

Downsample

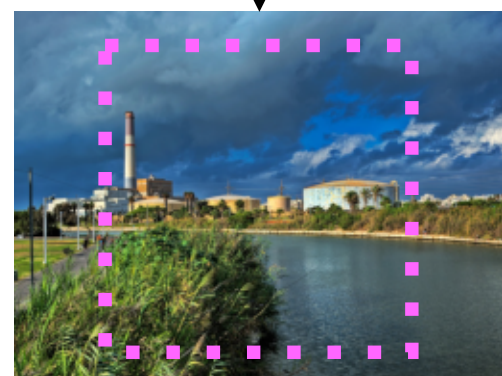

Pristine crops

$\underline{x}^1$

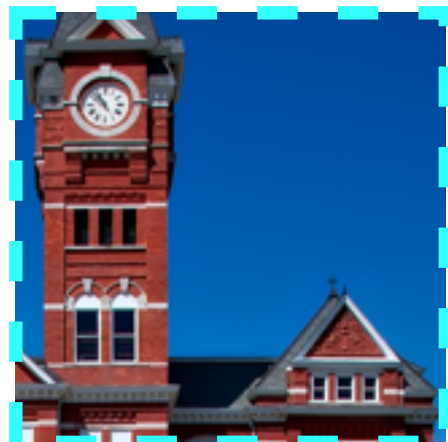

$\hat{\underline{x}}^1$

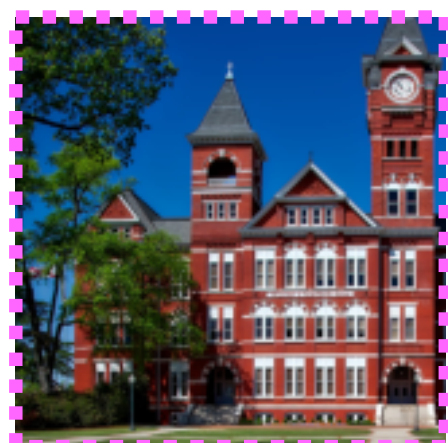

$\underline{x}^2$

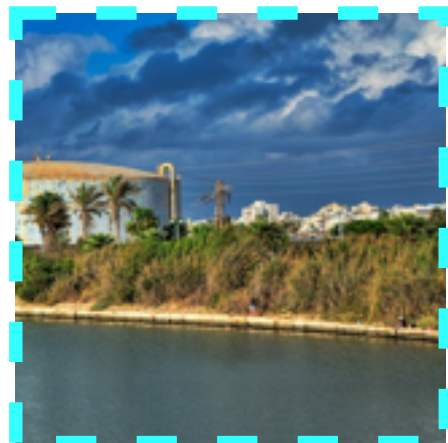

$\hat{\underline{x}}^2$

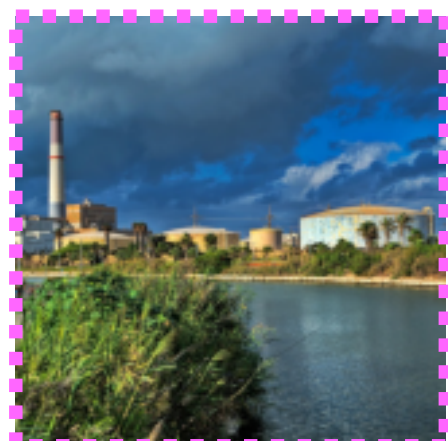

Distorted crops

$x^1$

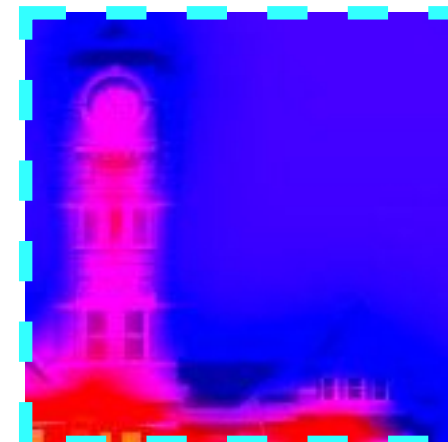

$\hat{x}^1$

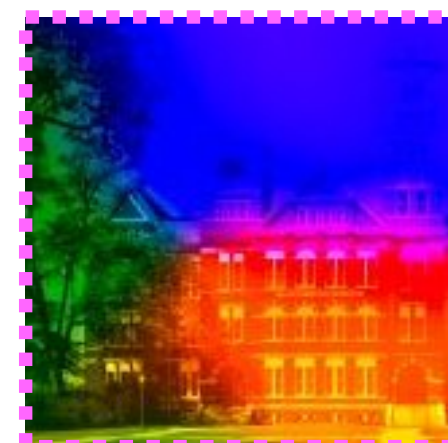

$x^2$

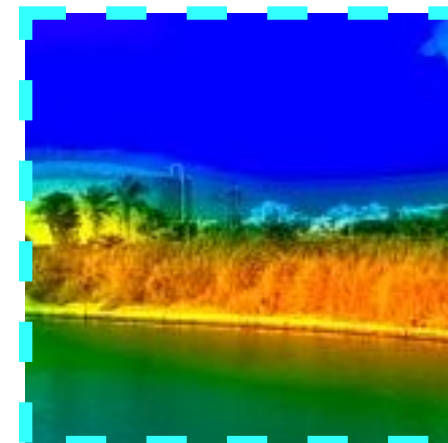

$\hat{x}^2$

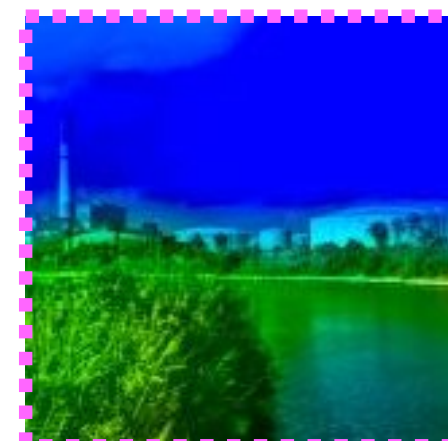

Embeddings

$z^1$

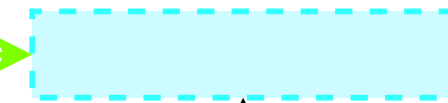

$\hat{z}^1$

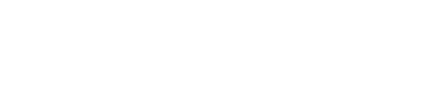

$z^2$

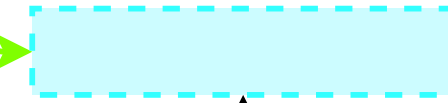

$\hat{z}^2$

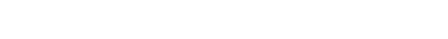

Crop

Degrade

Encoder

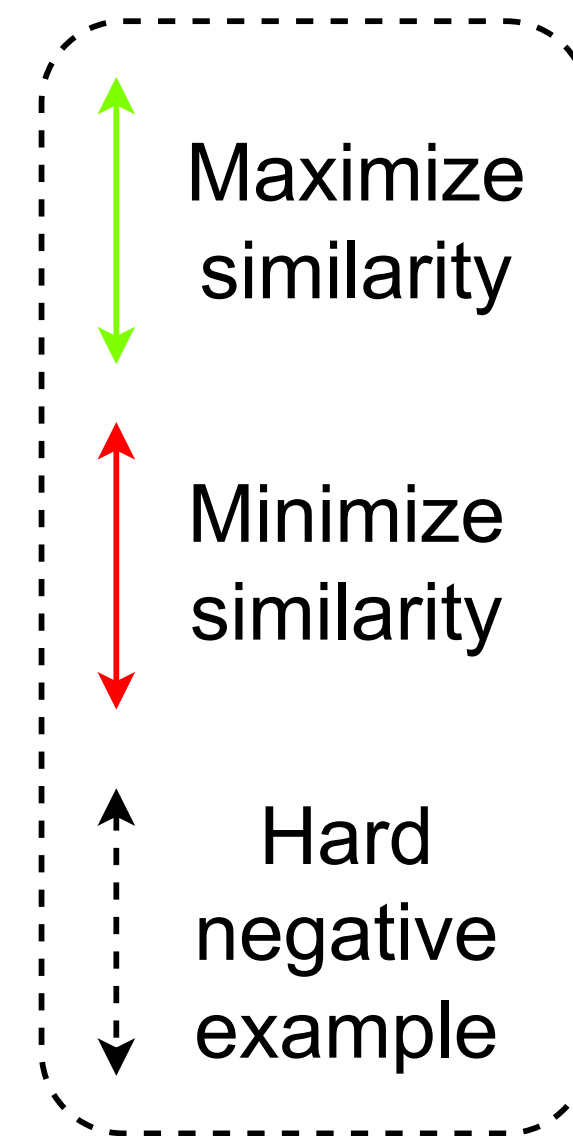

Supplement: Supplementary file 10 [file Agnolucci_Reference-Based_Restoration_of_WACV_2024_supplemental.zip]
