# Supplementary material
Source: ML conference proceedings conference paper supplement (https://openaccess.thecvf.com/content/WACV2024/html/Agnolucci_Reference-Based_Restoration_of_WACV_2024_paper.html)

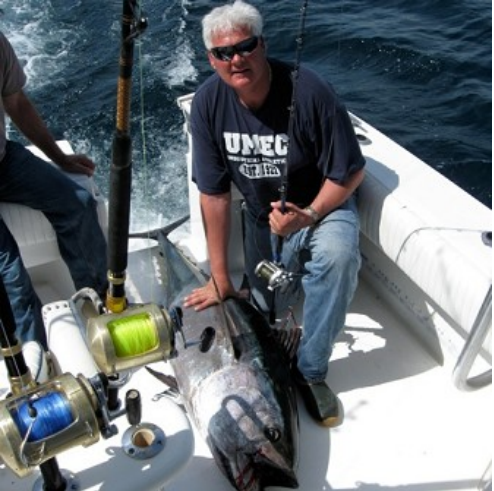

Best ARNIQA

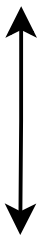

Fixed  
CONTRIQUE

Worst ARNIQA

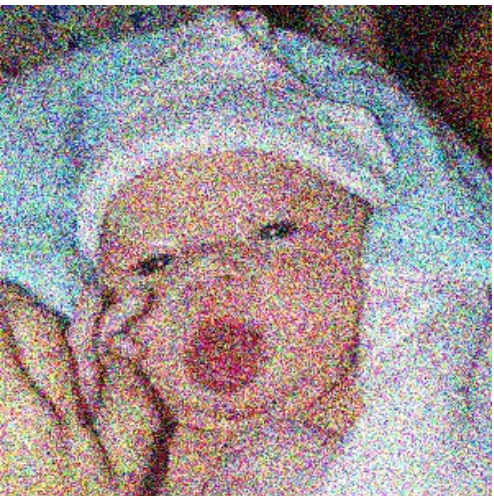

Supplement: Supplementary file 1 [file Agnolucci_Reference-Based_Restoration_of_WACV_2024_supplemental.zip]

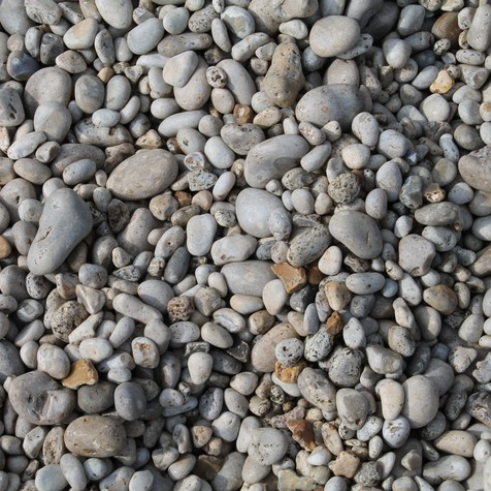

Best CONTRIQUE

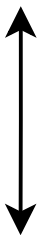

Fixed  
ARNIQA

Worst CONTRIQUE

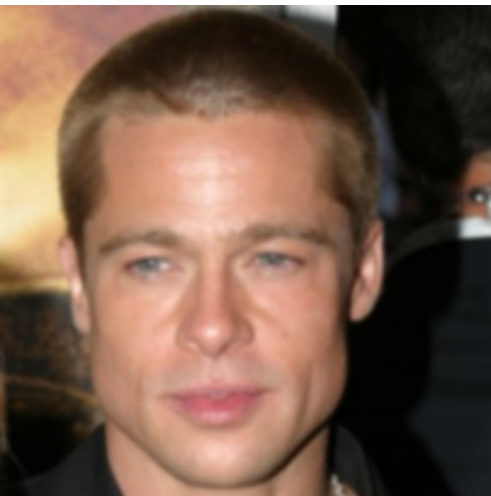

Supplement: Supplementary file 2 [file Agnolucci_Reference-Based_Restoration_of_WACV_2024_supplemental.zip]

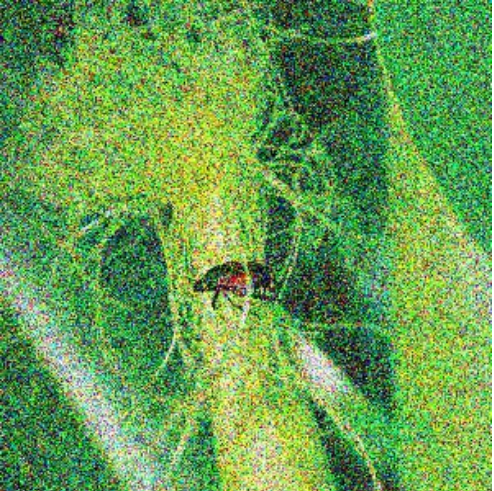

Best Re-IQA

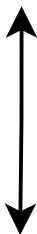

Fixed  
ARNIQA

Worst Re-IQA

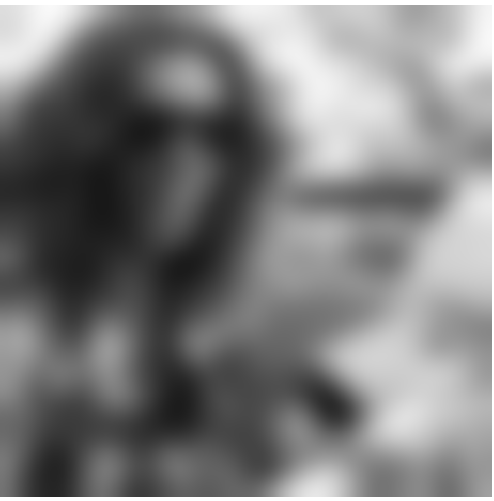

Supplement: Supplementary file 3 [file Agnolucci_Reference-Based_Restoration_of_WACV_2024_supplemental.zip]

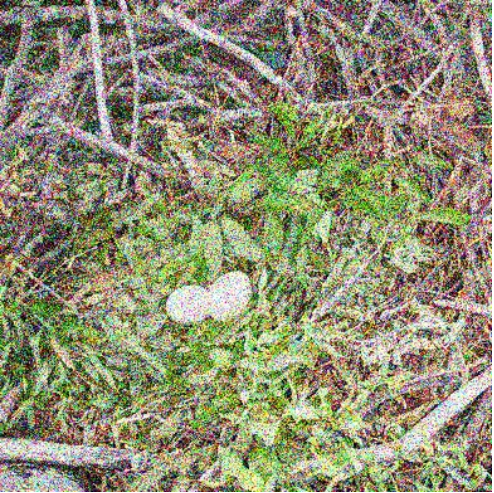

Best CONTRIQUE



Fixed  
ARNIQA

Worst CONTRIQUE

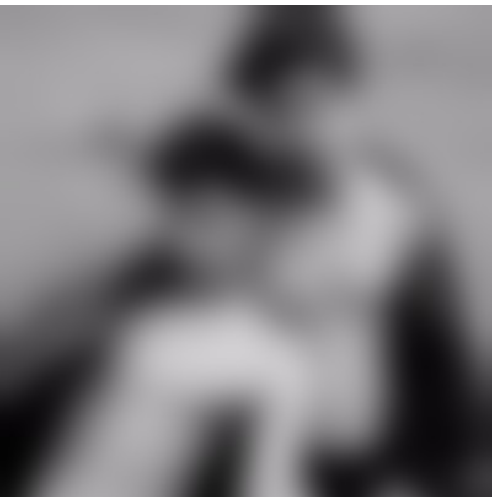

Supplement: Supplementary file 4 [file Agnolucci_Reference-Based_Restoration_of_WACV_2024_supplemental.zip]

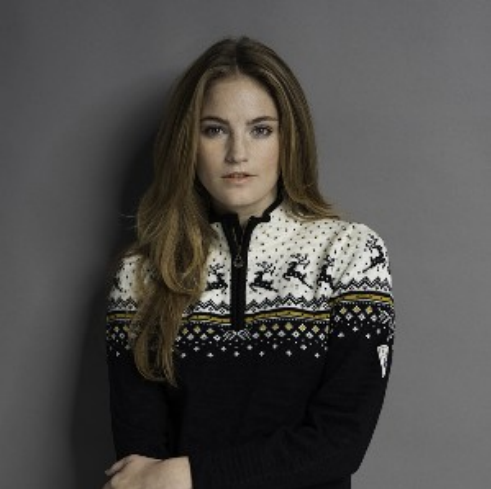

Best ARNIQA

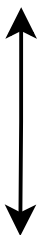

Fixed  
CONTRIQUE

Worst ARNIQA

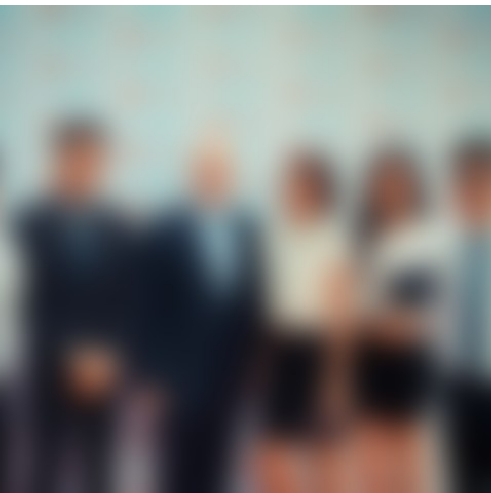

Supplement: Supplementary file 5 [file Agnolucci_Reference-Based_Restoration_of_WACV_2024_supplemental.zip]

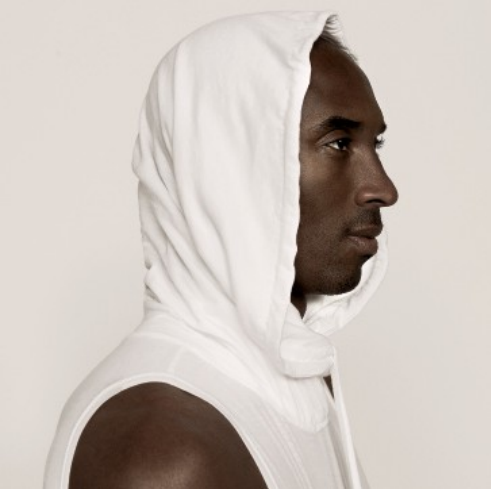

Best ARNIQA

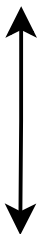

Fixed  
Re-IQA

Worst ARNIQA

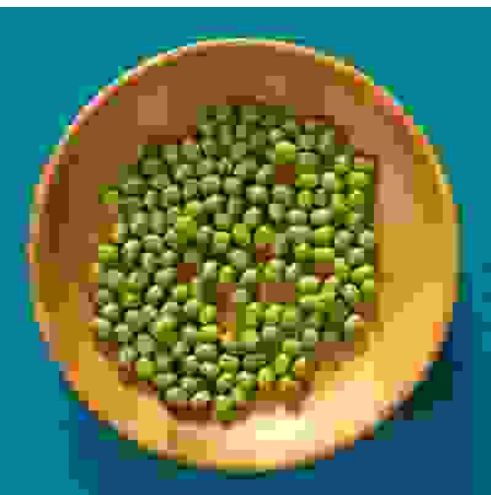

Supplement: Supplementary file 6 [file Agnolucci_Reference-Based_Restoration_of_WACV_2024_supplemental.zip]

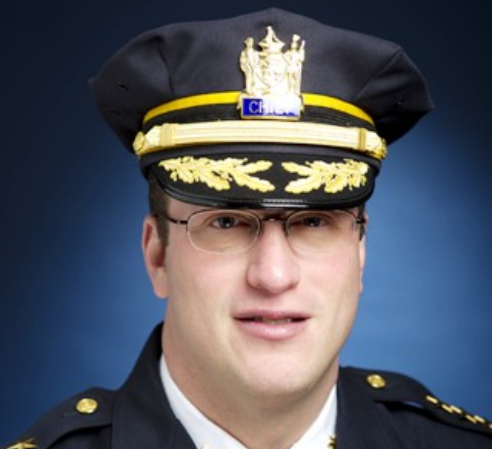

Best ARNIQA



Fixed  
Re-IQA

Worst ARNIQA

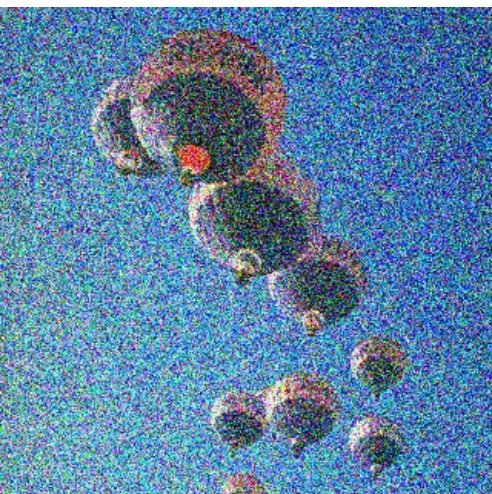

Supplement: Supplementary file 7 [file Agnolucci_Reference-Based_Restoration_of_WACV_2024_supplemental.zip]

# State of the Art

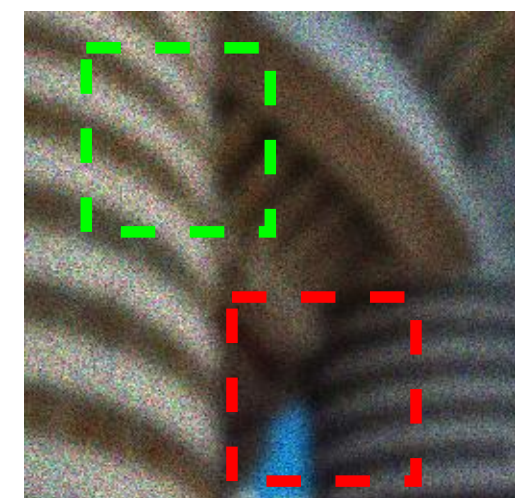

Similar content  
Same distortion

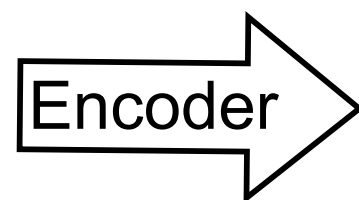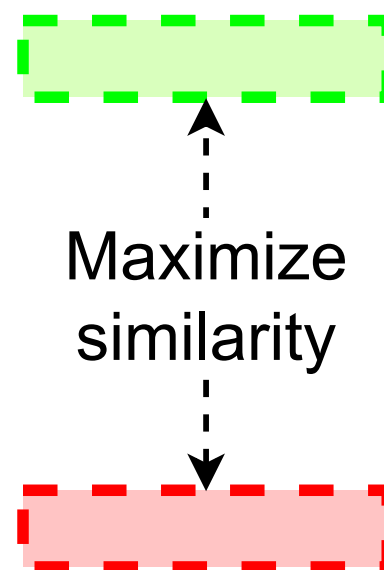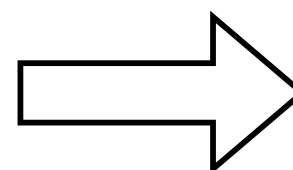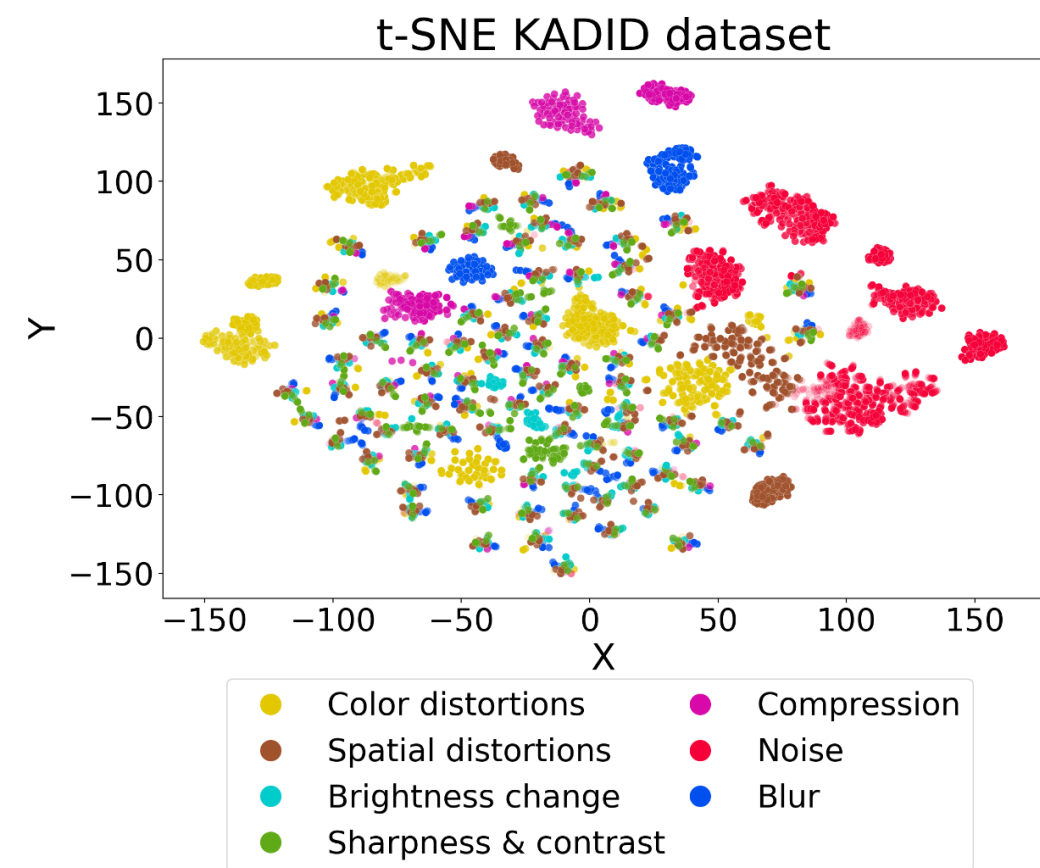

# ARNIQA

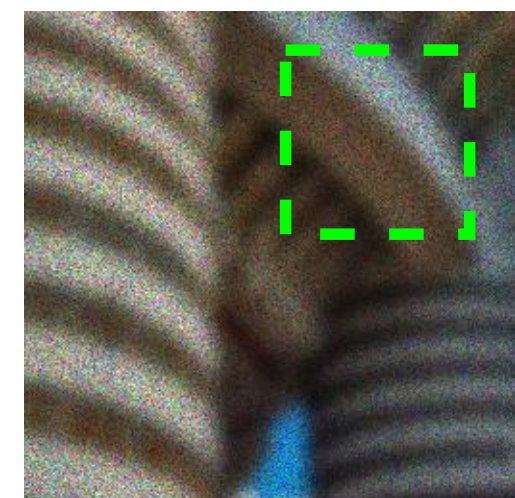

Different content  
Same distortion

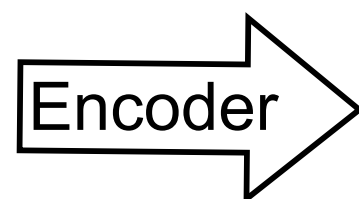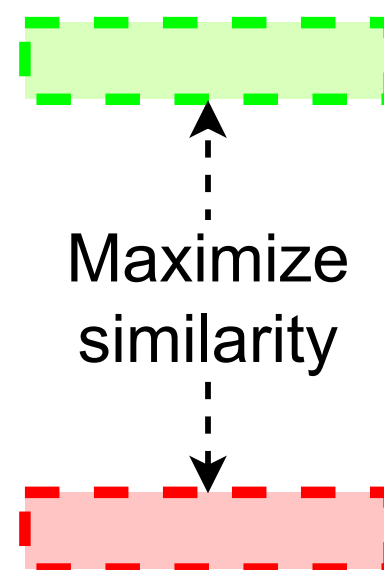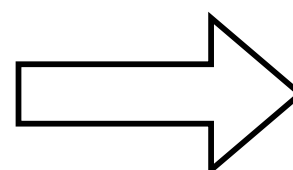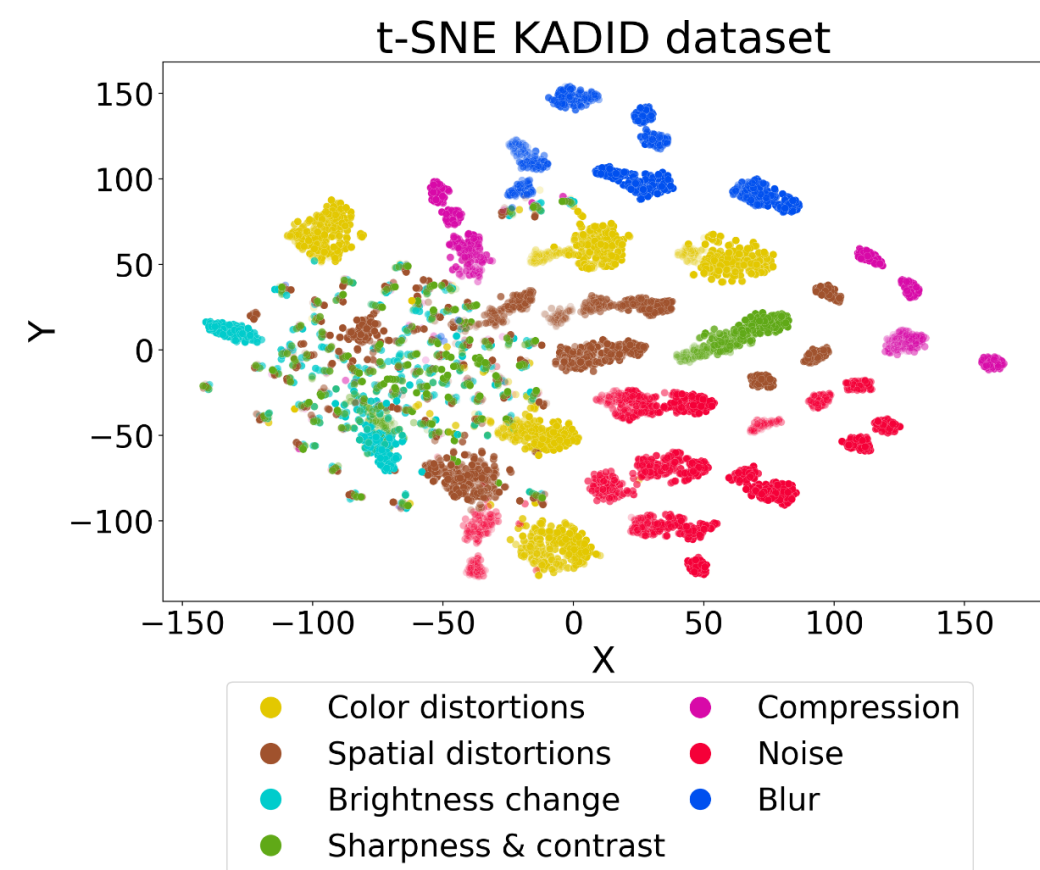

Supplement: Supplementary file 8 [file Agnolucci_Reference-Based_Restoration_of_WACV_2024_supplemental.zip]

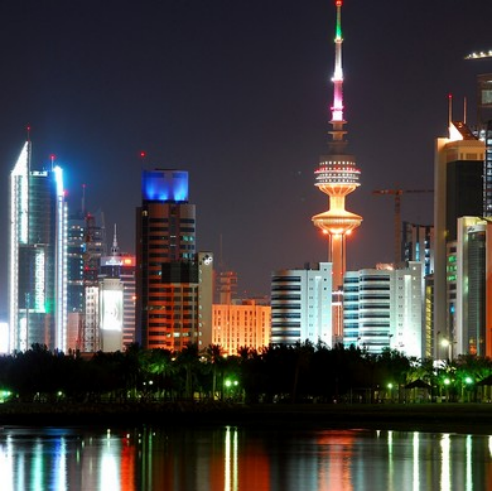

Best Re-IQA

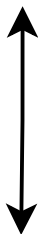

Fixed  
ARNIQA

Worst Re-IQA

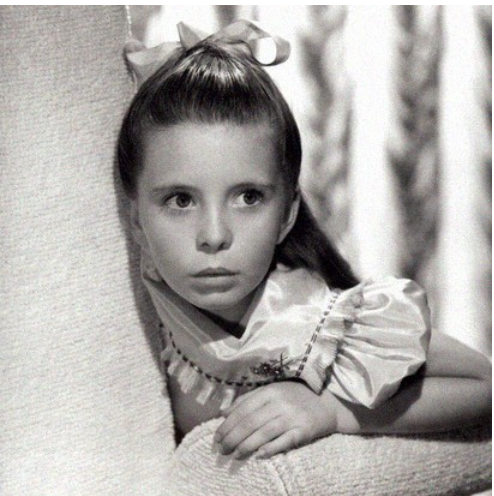

Supplement: Supplementary file 9 [file Agnolucci_Reference-Based_Restoration_of_WACV_2024_supplemental.zip]

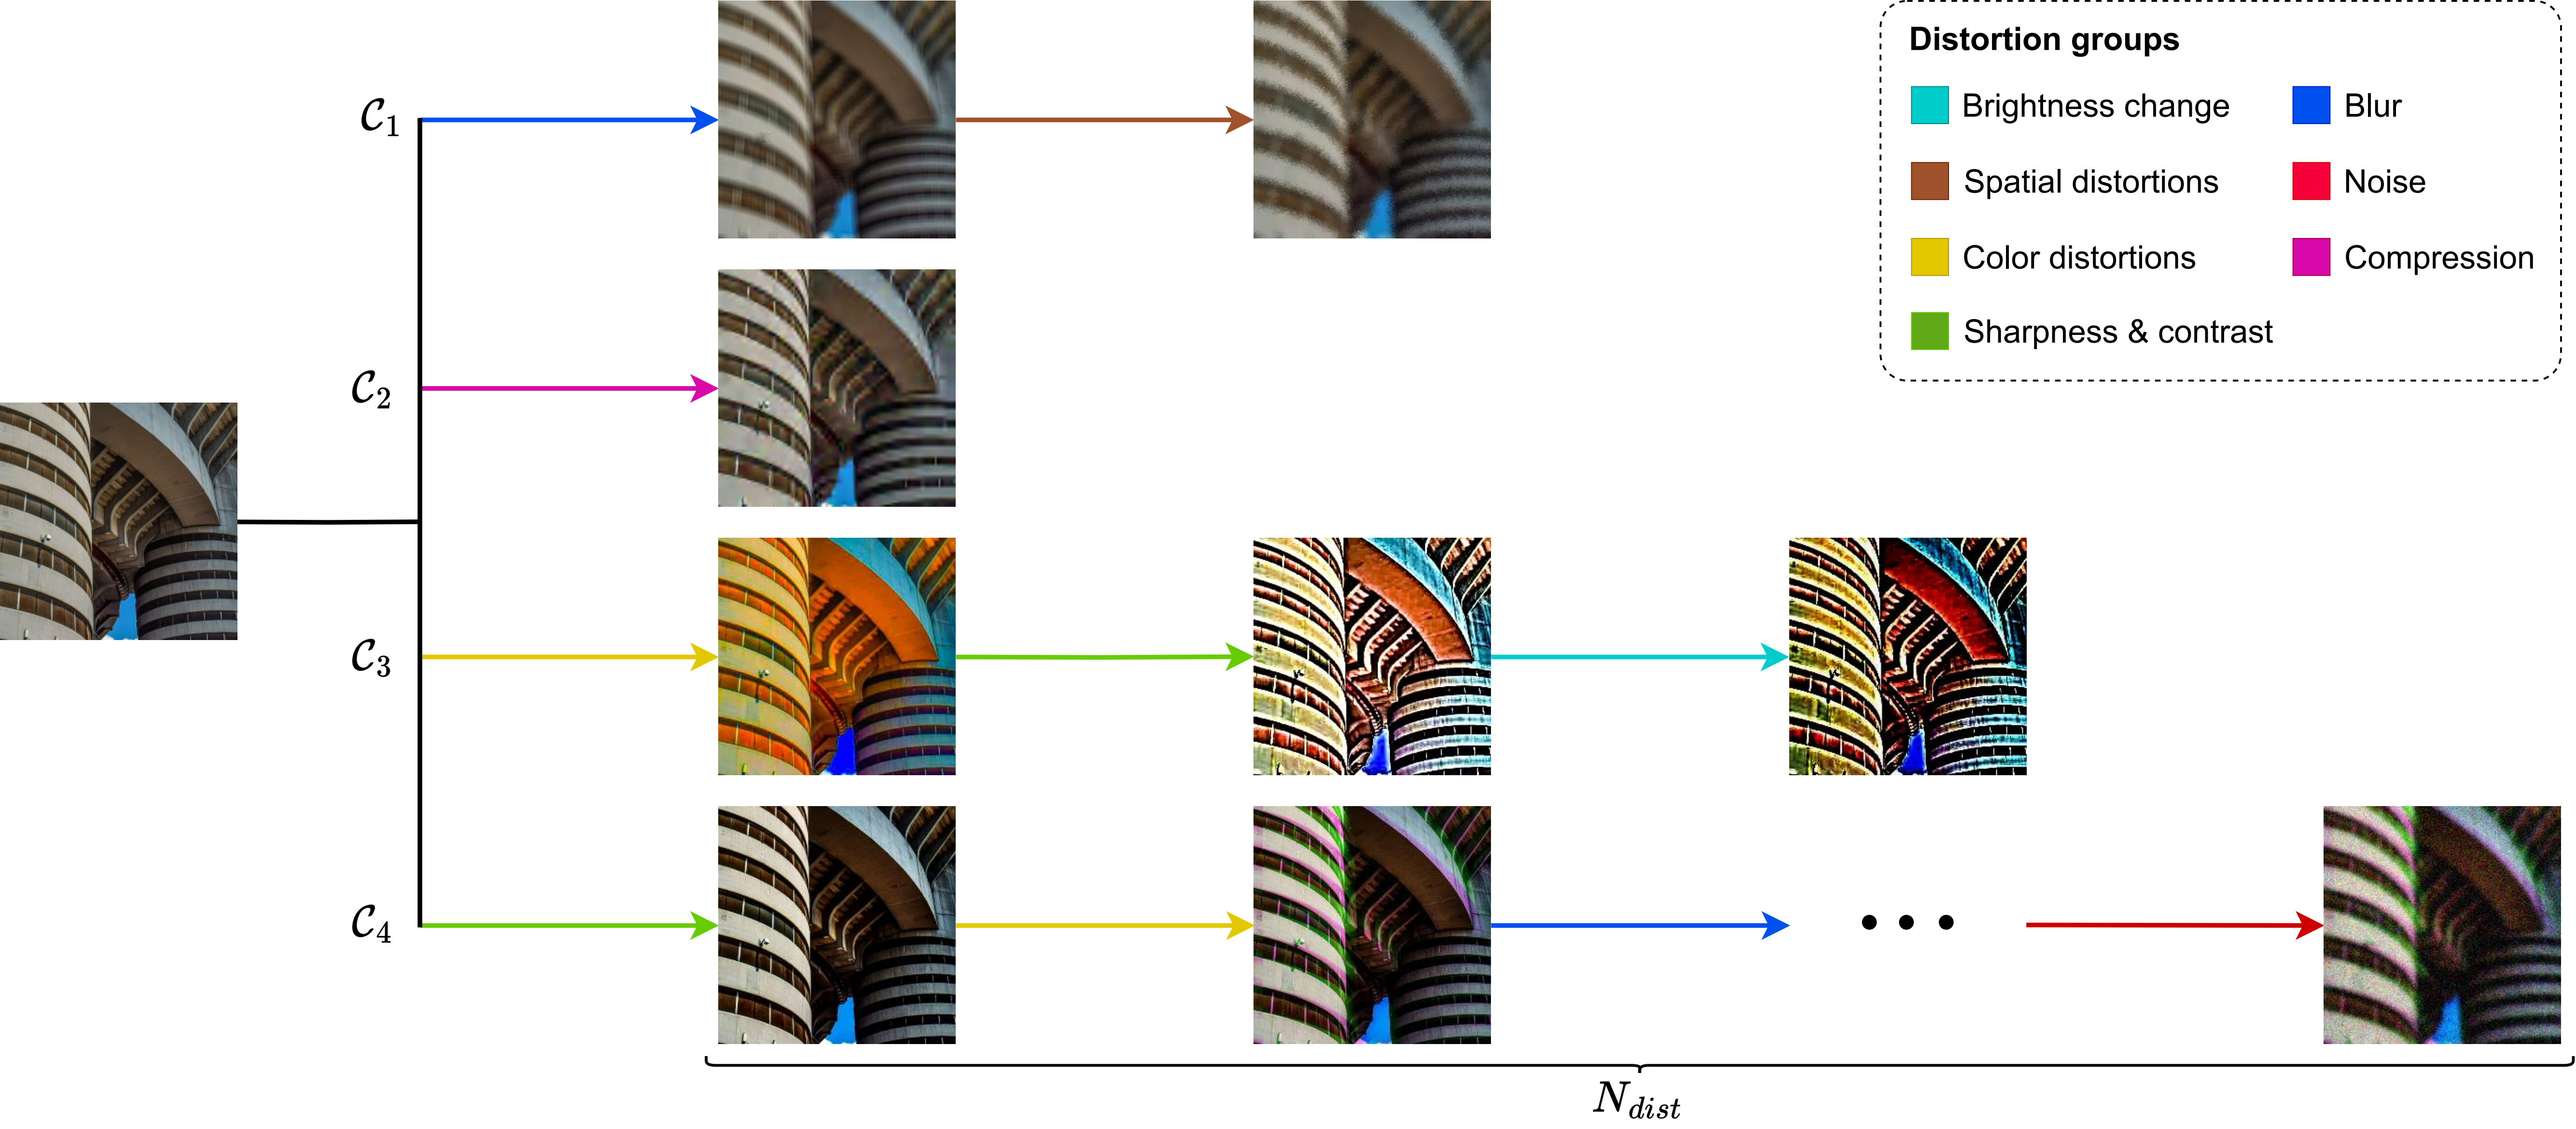

Supplement: Supplementary file 11 [file Agnolucci_Reference-Based_Restoration_of_WACV_2024_supplemental.zip]
